# Supplementary material for: Differential Expression of lncRNA-miRNA-mRNA and Their Related Functional Networks in New-Onset Type 2 Diabetes Mellitus among Chinese Rural Adults
Source: MDPI journal article supplement (doi:10.3390/genes13112073), 2022-11-09
Supplement: s1 [file s1]

## Supplementary Materials

**Table S1.** Descriptive characteristics of eight mixed samples.

**Table S2.** DE miRNAs.

**Table S3.** DE lncRNAs.

**Table S4.** DE mRNAs.

**Table S5.** Correlation analysis of DE miRNAs and HOMA-IR. Correlation coefficients were calculated using Spearman correlation analysis. Abbreviations: DE miRNAs, differentially expressed microRNA; IR, insulin resistance.

**Table S6.** Correlation analysis of DE lncRNAs and HOMA-IR. Correlation coefficients were calculated using Spearman correlation analysis. Abbreviations: DE lncRNAs, differentially expressed long noncoding RNA; IR, insulin resistance.

**Table S7.** Correlation analysis of DE mRNAs and HOMA-IR. Correlation coefficients were calculated using Spearman correlation analysis. Abbreviations: DE mRNAs, differentially expressed messenger RNA; IR, insulin resistance.

**Table S8.** Functional groups in GO term network analysis.

**Table S9.** Diabetes-related DEGs in GO term network analysis.

**Table S10.** The top 20 core node and their corresponding degree.

**Table S11.** CeRNA connectivity (top 20).

**Figure S1.** Correlation analysis of the samples.

**Figure S2.** The expression profiles of lncRNAs.

**Figure S3.** The expression profiles of Genes.

**Figure S4.** Comparison of the expression of 12 miRNAs in NGT and T2DM subjects. MiRNAs, microRNA; NGT, normal glucose tolerance; T2DM, type 2 diabetes mellitus. \* $p < 0.05$ , \*\* $p < 0.01$ .

**Figure S5.** Comparison of the expression of 12 lncRNAs in NGT and T2DM subjects. LncRNAs, long non-coding RNAs; NGT, normal glucose tolerance; T2DM, type 2 diabetes mellitus. \* $p < 0.05$ ; \*\* $p < 0.01$ .

**Figure S6.** Comparison of the expression of 12 mRNAs in NGT and T2DM subjects. mRNA, messenger RNA; NGT, normal glucose tolerance; T2DM, type 2 diabetes mellitus. \* $p < 0.05$ .

**Table S1.** Descriptive characteristics of eight mixed samples

| Variables                               | Case 1             | Case 2             | Case 3             | Case 4             | Control 1          | Control 2          | Control 3          | Control 4          |
|-----------------------------------------|--------------------|--------------------|--------------------|--------------------|--------------------|--------------------|--------------------|--------------------|
| Men, n (%)                              | 2 (33.33)          | 2 (33.33)          | 3 (50.00)          | 3 (50.00)          | 2 (33.33)          | 2 (33.33)          | 3 (50.00)          | 3 (50.00)          |
| Age (years, mean $\pm$ SD)              | 54.83 $\pm$ 9.00   | 56.50 $\pm$ 8.76   | 57.00 $\pm$ 8.74   | 57.33 $\pm$ 9.87   | 54.66 $\pm$ 9.31   | 56.17 $\pm$ 8.89   | 57.33 $\pm$ 9.00   | 57.67 $\pm$ 9.99   |
| BMI (kg/m <sup>2</sup> , mean $\pm$ SD) | 26.55 $\pm$ 2.25   | 25.55 $\pm$ 2.29   | 28.19 $\pm$ 3.42   | 25.89 $\pm$ 1.80   | 25.78 $\pm$ 2.43   | 26.18 $\pm$ 3.71   | 26.00 $\pm$ 2.47   | 26.18 $\pm$ 2.80   |
| SBP (mmHg, mean $\pm$ SD)               | 131.94 $\pm$ 17.79 | 130.28 $\pm$ 15.37 | 131.33 $\pm$ 11.59 | 146.00 $\pm$ 24.04 | 116.78 $\pm$ 14.84 | 128.44 $\pm$ 14.49 | 136.28 $\pm$ 24.95 | 123.67 $\pm$ 16.64 |
| DBP (mmHg, mean $\pm$ SD)               | 83.00 $\pm$ 8.80   | 80.67 $\pm$ 4.52   | 84.50 $\pm$ 9.57   | 92.11 $\pm$ 10.48  | 76.28 $\pm$ 6.81   | 82.22 $\pm$ 10.44  | 83.72 $\pm$ 12.10  | 77.94 $\pm$ 9.55   |
| FBG, (mmol/L, mean $\pm$ SD)            | 7.72 $\pm$ 0.56    | 8.28 $\pm$ 0.76    | 9.37 $\pm$ 1.78    | 8.08 $\pm$ 0.99    | 5.42 $\pm$ 0.60    | 5.23 $\pm$ 0.41    | 5.45 $\pm$ 0.19    | 5.35 $\pm$ 0.24    |
| INS, (mIU/L, mean $\pm$ SD)             | 10.43 $\pm$ 3.22   | 12.48 $\pm$ 3.13   | 23.98 $\pm$ 26.66  | 13.60 $\pm$ 4.08   | 8.77 $\pm$ 2.21    | 9.24 $\pm$ 3.28    | 9.96 $\pm$ 3.24    | 6.71 $\pm$ 1.38    |
| HOMA-IR, (mean $\pm$ SD)                | 3.61 $\pm$ 1.26    | 4.59 $\pm$ 1.25    | 10.14 $\pm$ 10.99  | 4.89 $\pm$ 1.47    | 2.14 $\pm$ 0.72    | 2.19 $\pm$ 0.92    | 2.42 $\pm$ 0.81    | 1.61 $\pm$ 0.41    |

Abbreviations: BMI, body mass index; SBP, systolic blood pressure; DBP, diastolic blood pressure; FBG, fasting blood glucose; INS, insulin.

**Table S2.** DE miRNAs

| ID           | <i>p</i> value | Log <sub>2</sub> (fold change) | target genes_Num | terms                                                                                                                                                                                                                         |
|--------------|----------------|--------------------------------|------------------|-------------------------------------------------------------------------------------------------------------------------------------------------------------------------------------------------------------------------------|
| miR-199b-5p  | 0.044          | 11.606                         | 6                | GO:0006629: lipid metabolic process; GO:0005509: calcium ion binding.                                                                                                                                                         |
| miR-190      | 0.021          | 11.032                         |                  |                                                                                                                                                                                                                               |
| miR-484      | 0.014          | 6.863                          | 9                | GO:0009743: response to carbohydrate; GO:0001523: retinoid metabolic process; GO:0006629: lipid metabolic process; GO:0009749: response to glucose; GO:1900077: negative regulation of cellular response to insulin stimulus. |
| miR-3944-5p  | 0.044          | 5.028                          | 8                | GO:0009749: response to glucose; GO:0030073: insulin secretion; GO:0032024: positive regulation of insulin secretion.                                                                                                         |
| miR-200c-3p  | 0.029          | -2.735                         | 15               | GO:0000165: MAPK cascade; GO:0007165: signal transduction; GO:0043087: regulation of GTPase activity;                                                                                                                         |
| miR-871      | 0.000          | -3.724                         | 6                | GO:0043488: regulation of mRNA stability; GO:0000187: activation of MAPK activity.                                                                                                                                            |
| miR-50       | 0.000          | -5.220                         | 5                | GO:0006796: phosphate-containing compound metabolic process; GO:0006811: ion transport;                                                                                                                                       |
| miR-351      | 0.003          | -7.129                         | 7                | GO:0000165: MAPK cascade; GO:0007165: signal transduction.                                                                                                                                                                    |
| miR-574      | 0.048          | -9.932                         |                  |                                                                                                                                                                                                                               |
| miR-5129     | 0.021          | -10.538                        |                  |                                                                                                                                                                                                                               |
| miR-25-5p    | 0.026          | -11.012                        | 3                | GO:0000187: activation of MAPK activity; GO:0001666: response to hypoxia; GO:0001934: positive regulation of protein phosphorylation.                                                                                         |
| miR-1255b-5p | 0.008          | -11.168                        | 11               | GO:0006796: phosphate-containing compound metabolic process; GO:0006811: ion transport; GO:0006814: sodium ion transport;                                                                                                     |

**Table S3.** DElncRNAs

| <b>ID</b>       | <b>Symbol</b> | <b><i>p</i> value</b> | <b>Log<sub>2</sub> (fold change)</b> |
|-----------------|---------------|-----------------------|--------------------------------------|
| ENST00000379053 | LINC00654     | 0.019                 | 2.559                                |
| ENST00000524745 | ZBED9         | 0.013                 | -2.675                               |
| ENST00000527986 | WAC-AS1       | 0.020                 | -4.359                               |
| ENST00000562900 | AC009035.1    | 0.014                 | -1.973                               |
| ENST00000566814 | Z95115.1      | 0.020                 | -3.645                               |
| ENST00000582452 | LINC00683     | 0.002                 | -1.204                               |
| ENST00000636531 | AC006453.3    | 0.023                 | -5.352                               |
| ENST00000650382 | AL031315.1    | 0.010                 | 3.485                                |
| ENST00000651360 | PRR26         | 0.021                 | -2.874                               |
| ENST00000659693 | LINC01361     | 0.003                 | 4.052                                |
| ENST00000664311 | LINC02798     | 0.016                 | 3.467                                |
| ENST00000666972 | MEG8          | 0.008                 | -1.692                               |

**Table S4. DEmRNAs**

| ID              | Symbol          | Log <sub>2</sub> (fold change) | terms                                                                                                                                                                                                                                             |
|-----------------|-----------------|--------------------------------|---------------------------------------------------------------------------------------------------------------------------------------------------------------------------------------------------------------------------------------------------|
| ENSG00000110013 | <i>SIAE</i>     | -1.741                         | GO:0002682: regulation of immune system process; GO:0005975: carbohydrate metabolic process.                                                                                                                                                      |
| ENSG00000163281 | <i>GNPDA2</i>   | 2.428                          | GO:0005975: carbohydrate metabolic process; GO:0006043 glucosamine catabolic process.                                                                                                                                                             |
| ENSG00000198730 | <i>CTR9</i>     | -2.385                         | GO:0000993: RNA polymerase II core binding; GO:0016055: Wnt signaling pathway.                                                                                                                                                                    |
| ENSG00000186314 | <i>PRELID2</i>  | -2.482                         | GO:0015914: phospholipid transport.                                                                                                                                                                                                               |
| ENSG00000256660 | <i>CLEC12B</i>  | -2.720                         | GO:0019903: protein phosphatase binding; GO:0030246: carbohydrate binding.                                                                                                                                                                        |
| ENSG00000204406 | <i>MBD5</i>     | 0.622                          | GO:0042593: glucose homeostasis; GO:0060399: positive regulation of growth hormone receptor signaling pathway.                                                                                                                                    |
| ENSG00000177000 | <i>MTHFR</i>    | -1.393                         | Ko01100: Metabolic pathways; ko01200: Carbon metabolism; ko01523: Antifolate resistance; ko00670: One carbon pool by folate.                                                                                                                      |
| ENSG00000120053 | <i>GOT1</i>     | -3.388                         | GO:0006094: gluconeogenesis; GO:0006114: glycerol biosynthetic process; GO:0032869: cellular response to insulin stimulus.                                                                                                                        |
| ENSG00000059804 | <i>SLC2A3</i>   | -3.217                         | GO:0005355: glucose transmembrane transporter activity; GO:0005536: glucose binding.                                                                                                                                                              |
| ENSG00000143882 | <i>ATP6V1C2</i> | -1.885                         | GO:0008286: insulin receptor signaling pathway; GO:0030177: positive regulation of Wnt signaling pathway.                                                                                                                                         |
| ENSG00000169100 | <i>SLC25A6</i>  | 2.019                          | GO:0050796: regulation of insulin secretion; GO:0005471: ATP, ADP antiporter activity.                                                                                                                                                            |
| ENSG00000151729 | <i>SLC25A4</i>  | -2.852                         | GO:0006626: protein targeting to mitochondrion; GO:0050796: regulation of insulin secretion.                                                                                                                                                      |
| ENSG00000153093 | <i>ACOXL</i>    | -1.181                         | GO:0006631; fatty acid metabolic process;GO:0006635; fatty acid beta-oxidation;GO:0008150; biological_process;GO:0033540; fatty acid beta-oxidation using acyl-CoA oxidase;GO:0055088; lipid homeostasis;GO:0055114; oxidation-reduction process. |
| ENSG00000166106 | <i>ADAMTS15</i> | 3.205                          | GO:0006508; proteolysis.                                                                                                                                                                                                                          |
| ENSG00000180772 | <i>AGTR2</i>    | 3.114                          | GO:0001991; regulation of systemic arterial blood pressure by circulatory renin-angiotensin;GO:0002018; renin-angiotensin regulation of aldosterone production.                                                                                   |
| ENSG00000183020 | <i>AP2A2</i>    | -2.566                         | GO:0008289; lipid binding.                                                                                                                                                                                                                        |
| ENSG00000129691 | <i>ASH2L</i>    | -4.387                         | GO:0043627; response to estrogen.                                                                                                                                                                                                                 |
| ENSG00000139178 | <i>C1RL</i>     | -1.786                         | GO:0002376; immune system process.                                                                                                                                                                                                                |
| ENSG00000152495 | <i>CAMK4</i>    | 1.438                          | GO:0002250; adaptive immune response;GO:0002376; immune system process.                                                                                                                                                                           |
| ENSG00000154080 | <i>CHST9</i>    | 1.480                          | GO:0005975; carbohydrate metabolic process.                                                                                                                                                                                                       |

|                 |                |        |                                                                                                                                                                                                                                    |
|-----------------|----------------|--------|------------------------------------------------------------------------------------------------------------------------------------------------------------------------------------------------------------------------------------|
| ENSG00000137869 | <i>CYP19A1</i> | 2.087  | GO:0002677; negative regulation of chronic inflammatory response;GO:0006694; steroid biosynthetic process;GO:0006703; estrogen biosynthetic process;GO:0006710; androgen catabolic process;GO:0008209; androgen metabolic process. |
| ENSG00000104325 | <i>DECR1</i>   | -2.082 | GO:0006629; lipid metabolic process;GO:0006631; fatty acid metabolic process;GO:0006635; fatty acid beta-oxidation;GO:0055114; oxidation-reduction process.                                                                        |
| ENSG00000137942 | <i>FNBP1L</i>  | -1.715 | GO:0005515; protein binding;GO:0008289; lipid binding;GO:0045296; cadherin binding;GO:0051020; GTPase binding.                                                                                                                     |
| ENSG00000033170 | <i>FUT8</i>    | -1.921 | GO:0007179; transforming growth factor beta receptor signaling pathway;GO:0007229; integrin-mediated signaling pathway.                                                                                                            |
| ENSG00000175229 | <i>GAL3ST3</i> | 6.741  | GO:0005996; monosaccharide metabolic process; GO:0009247; glycolipid biosynthetic process.                                                                                                                                         |
| ENSG00000133895 | <i>MEN1</i>    | 2.129  | GO:0071333; cellular response to glucose stimulus;GO:0071375; cellular response to peptide hormone stimulus.                                                                                                                       |
| ENSG00000008130 | <i>NADK</i>    | 7.704  | GO:0035774; positive regulation of insulin secretion involved in cellular response to glucose stimulus;GO:0046034; ATP metabolic process.                                                                                          |
| ENSG00000125779 | <i>PANK2</i>   | 1.254  | GO:0090207; regulation of triglyceride metabolic process;GO:1904251; regulation of bile acid metabolic process                                                                                                                     |
| ENSG00000101333 | <i>PLCB4</i>   | 2.338  | GO:0006629; lipid metabolic process.                                                                                                                                                                                               |
| ENSG00000154822 | <i>PLCL2</i>   | 1.642  | GO:0016042; lipid catabolic process.                                                                                                                                                                                               |
| ENSG00000179598 | <i>PLD6</i>    | 7.036  | GO:0006629; lipid metabolic process;GO:0006654; phosphatidic acid biosynthetic process.                                                                                                                                            |
| ENSG00000185345 | <i>PRKN</i>    | -3.353 | GO:0032368; regulation of lipid transport;GO:0046676; negative regulation of insulin secretion.                                                                                                                                    |
| ENSG00000186350 | <i>RXRA</i>    | 2.670  | GO:0003707; steroid hormone receptor activity.                                                                                                                                                                                     |
| ENSG00000146411 | <i>SLC2A12</i> | 3.019  | GO:0008643; carbohydrate transport;GO:0008645; hexose transport;GO:0046323; glucose import;GO:0055085; transmembrane transport;GO:1902600; hydrogen ion transmembrane transport;GO:1904659; glucose transmembrane transport        |
| ENSG00000022567 | <i>SLC45A4</i> | 4.637  | O:0015770; sucrose transport.                                                                                                                                                                                                      |
| ENSG00000065609 | <i>SNAP91</i>  | -3.121 | GO:0000149; SNARE binding;GO:0005515; protein binding;GO:0005543; phospholipid binding.                                                                                                                                            |
| ENSG00000111728 | <i>ST8SIA1</i> | 0.792  | GO:0005975; carbohydrate metabolic process;GO:0006486; protein glycosylation;GO:0006629; lipid metabolic process.                                                                                                                  |
| ENSG00000101849 | <i>TBL1X</i>   | 2.100  | GO:0019216; regulation of lipid metabolic process.                                                                                                                                                                                 |

---

**Table S5.** Correlation analysis of DEmiRNAs and HOMA-IR.

| ID           | Correlation coefficient <sup>a</sup> | <i>p</i> value |
|--------------|--------------------------------------|----------------|
| miR-199b-5p  | 0.445                                | 0.317          |
| miR-190      | 0.964                                | <0.001         |
| miR-484      | 0.613                                | 0.144          |
| miR-3944-5p  | 0.482                                | 0.274          |
| miR-200c-3p  | 0.214                                | 0.645          |
| miR-871      | -0.929                               | 0.003          |
| miR-50       | -0.893                               | 0.007          |
| miR-351      | -0.741                               | 0.057          |
| miR-574      | -0.906                               | 0.005          |
| miR-5129     | -0.906                               | 0.005          |
| miR-25-5p    | -0.445                               | 0.317          |
| miR-1255b-5p | -0.867                               | 0.012          |

<sup>a</sup>Correlation coefficients were calculated using Spearman correlation analysis. Abbreviations: DEmiRNAs, differentially expressed microRNA; IR, insulin resistance.

**Table S6.** Correlation analysis of DElncRNAs and HOMA-IR.

| ID              | Symbol     | Correlation coefficient <sup>a</sup> | <i>p</i> value |
|-----------------|------------|--------------------------------------|----------------|
| ENST00000379053 | LINC00654  | 0.607                                | 0.148          |
| ENST00000524745 | ZBED9      | -0.607                               | 0.148          |
| ENST00000527986 | WAC-AS1    | -0.741                               | 0.057          |
| ENST00000562900 | AC009035.1 | -0.750                               | 0.052          |
| ENST00000566814 | Z95115.1   | -0.775                               | 0.041          |
| ENST00000582452 | LINC00683  | -0.500                               | 0.253          |
| ENST00000636531 | AC006453.3 | -0.704                               | 0.077          |
| ENST00000650382 | AL031315.1 | 0.631                                | 0.129          |
| ENST00000651360 | PRR26      | -0.964                               | <0.001         |
| ENST00000659693 | LINC01361  | 0.523                                | 0.229          |
| ENST00000664311 | LINC02798  | 0.649                                | 0.115          |
| ENST00000666972 | MEG8       | -0.714                               | 0.071          |

<sup>a</sup>Correlation coefficients were calculated using Spearman correlation analysis. Abbreviations: DElncRNAs, differentially expressed long noncoding RNA; IR, insulin resistance.



**Table S7.** Correlation analysis of DEmRNAs and HOMA-IR.

| ID              | Symbol          | Correlation coefficient <sup>a</sup> | <i>p</i> value |
|-----------------|-----------------|--------------------------------------|----------------|
| ENSG00000110013 | <i>SIAE</i>     | -0.857                               | 0.014          |
| ENSG00000163281 | <i>GNPDA2</i>   | 0.750                                | 0.052          |
| ENSG00000198730 | <i>CTR9</i>     | -0.286                               | 0.535          |
| ENSG00000186314 | <i>PRELID2</i>  | -0.750                               | 0.052          |
| ENSG00000256660 | <i>CLEC12B</i>  | -0.685                               | 0.090          |
| ENSG00000204406 | <i>MBD5</i>     | 0.429                                | 0.337          |
| ENSG00000177000 | <i>MTHFR</i>    | -0.571                               | 0.180          |
| ENSG00000120053 | <i>GOT1</i>     | -0.964                               | <0.001         |
| ENSG00000059804 | <i>SLC2A3</i>   | -0.857                               | 0.014          |
| ENSG00000143882 | <i>ATP6V1C2</i> | -0.679                               | 0.094          |
| ENSG00000169100 | <i>SLC25A6</i>  | 0.468                                | 0.289          |
| ENSG00000151729 | <i>SLC25A4</i>  | -0.857                               | 0.014          |

<sup>a</sup>Correlation coefficients were calculated using Spearman correlation analysis. Abbreviations: DEmRNAs, differentially expressed messenger RNA; IR, insulin resistance.

**Table S8.** Functional groups in GO term network analysis.

| <b>GO functional groups</b> | <b>The most significant functional</b>                                         | <b>Corrected <i>p</i> value<sup>a</sup></b> |
|-----------------------------|--------------------------------------------------------------------------------|---------------------------------------------|
| Group-1                     | Trans-synaptic signaling by endocannabinoid                                    | 0.00005802                                  |
| Group-2                     | Interleukin-1 beta production                                                  | 0.00230861                                  |
| Group-3                     | Regulation of establishment of endothelial barrier                             | 0.00217613                                  |
| Group-4                     | Fusion of virus membrane with host plasma membrane                             | 0.00004160                                  |
| Group-5                     | Regulation of lipase activity                                                  | 0.00000665                                  |
| Group-6                     | Postsynaptic signal transduction                                               | 0.00000001                                  |
| Group-7                     | Adenylate cyclase-modulating G protein-coupled receptor signaling pathway      | 0.00000007                                  |
| Group-8                     | Tricarboxylic acid cycle                                                       | 0.00004416                                  |
| Group-9                     | Wnt signaling pathway calcium modulating pathway                               | <0.00000001                                 |
| Group-10                    | Polyol metabolic process                                                       | <0.00000001                                 |
| Group-11                    | Phospholipase C-activating G protein-coupled receptor signaling pathway        | 0.00000002                                  |
| Group-12                    | Mitochondrial ATP synthesis coupled proton transport                           | <0.00000001                                 |
| Group-13                    | Negative regulation of cell growth involved in cardiac muscle cell development | <0.00000001                                 |
| Group-14                    | Lipid catabolic process                                                        | <0.00000001                                 |
| Group-15                    | Glycosphingolipid biosynthetic process                                         | 0.00090846                                  |

<sup>a</sup>Adjusted group *p* value corrected with Bonferroni step down procedure. Abbreviations: GO, Gene Ontology.

**Table S9.** Diabetes-related DEGs in GO term network analysis

| GO Term ID | GO functional groups | GO Term                                                                   | Corrected <i>p</i> value <sup>a</sup> | Associated DEGs                                                             |
|------------|----------------------|---------------------------------------------------------------------------|---------------------------------------|-----------------------------------------------------------------------------|
| GO:1905953 | Group-13, 14         | Negative regulation of lipid localization                                 | 0.0025                                | <i>AGTR2</i>                                                                |
| GO:1905952 | Group-5, 14          | Regulation of lipid localization                                          | 0.0039                                | <i>CYP19A1, PRKN, RNRA</i>                                                  |
| GO:1903522 | Group-11, 13         | Regulation of blood circulation                                           | 0.0004                                | <i>DLG1</i>                                                                 |
| GO:1901137 | Group-12             | Carbohydrate derivative biosynthetic process                              | <0.0001                               | <i>ALG1, ATP5F1E, CEMIP, CHST9, DCTD, FUT8, GAL3ST3</i>                     |
| GO:0090207 | Group-14             | Regulation of triglyceride metabolic process                              | 0.0010                                | <i>PANK2</i>                                                                |
| GO:0060191 | Group-5, 14          | Regulation of lipase activity                                             | 0.0001                                | <i>ARL1, BICD1</i>                                                          |
| GO:0046889 | Group-14             | Positive regulation of lipid biosynthetic process                         | 0.0139                                | <i>MID1IP1, WNT4,</i>                                                       |
| GO:0045923 | Group-14             | Positive regulation of fatty acid metabolic process                       | 0.0139                                | <i>MID1IP1</i>                                                              |
| GO:0045913 | Group-10, 11, 13, 14 | Positive regulation of carbohydrate metabolic process                     | 0.0111                                | <i>DDB1</i>                                                                 |
| GO:0045834 | Group-5, 14          | Positive regulation of lipid metabolic process                            | 0.0005                                | <i>MID1IP1, WNT4</i>                                                        |
| GO:0045744 | Group-13             | Negative regulation of G protein-coupled receptor signaling pathway       | 0.0056                                | <i>BICD1, LY6G6E</i>                                                        |
| GO:0044242 | Group-14             | Cellular lipid catabolic process                                          | 0.0008                                | <i>ACOXL, DECR1, LONP2, MGLL, SPHK1</i>                                     |
| GO:0043648 | Group-8              | Dicarboxylic acid metabolic process                                       | 0.0046                                | <i>ATCAY, GOT1, MTHFR, PCDHGA5</i>                                          |
| GO:0043647 | Group-10             | Inositol phosphate metabolic process                                      | 0.0001                                | <i>PLCB1, PLCB4</i>                                                         |
| GO:0043470 | Group-14             | Regulation of carbohydrate catabolic process                              | 0.0129                                | <i>POM121,</i>                                                              |
| GO:0032651 | Group-2              | Regulation of interleukin-1 beta production                               | 0.0115                                | <i>SPHK1</i>                                                                |
| GO:0016042 | Group-14             | Lipid catabolic process                                                   | <0.0001                               | <i>ACOXL, CYP19A1, DECR1, LONP2, MGLL, PLCB1, PLCB4, PLCL2, PLD6, SPHK1</i> |
| GO:0015908 | Group-13, 14         | Fatty acid transport                                                      | 0.0122                                | <i>AGTR2, MID1IP1</i>                                                       |
| GO:0010675 | Group-10, 14         | Regulation of cellular carbohydrate metabolic process                     | 0.0141                                | <i>DDB1, PRKN</i>                                                           |
| GO:0010517 | Group-5              | Regulation of phospholipase activity                                      | 0.0016                                | <i>BICD1, ARL1</i>                                                          |
| GO:0008277 | Group-6, 13          | Regulation of G protein-coupled receptor signaling pathway                | 0.0141                                | <i>BICD1, LY6G6E, MGLL, PLCB1, RGS1</i>                                     |
| GO:0007223 | Group-6, 9, 10       | Wnt signaling pathway, calcium modulating pathway                         | 0.0001                                | <i>PLCB1,</i>                                                               |
| GO:0007213 | Group-6, 10, 13      | G protein-coupled acetylcholine receptor signaling pathway                | 0.0001                                | <i>PLCB1</i>                                                                |
| GO:0007200 | Group-11, 14         | Phospholipase C-activating G protein-coupled receptor signaling pathway   | <0.0001                               | <i>BICD1</i>                                                                |
| GO:0007193 | Group-7, 9, 13       | Adenylate cyclase-inhibiting G protein-coupled receptor signaling pathway | 0.0022                                | <i>RGS1</i>                                                                 |
| GO:0007188 | Group-7, 9           | Adenylate cyclase-modulating G protein-coupled receptor signaling pathway | <0.0001                               | <i>ADGRB3, PTH2R, RGS1</i>                                                  |
| GO:0006688 | Group-15             | Glycosphingolipid biosynthetic process                                    | 0.0076                                | <i>ST8SIA1</i>                                                              |

|            |                  |                                        |        |                            |
|------------|------------------|----------------------------------------|--------|----------------------------|
| GO:0006641 | Group-14         | Triglyceride metabolic process         | 0.0008 | <i>MGLL, PANK2,</i>        |
| GO:0006635 | Group-14         | Fatty acid beta-oxidation              | 0.0111 | <i>ACOXL, DECR1, LONP2</i> |
| GO:0006107 | Group-8          | Oxaloacetate metabolic process         | 0.0007 | <i>GOT1,</i>               |
| GO:0006099 | Group-8          | Tricarboxylic acid cycle               | 0.0001 | <i>PCDHGA5,</i>            |
| GO:0006094 | Group-8          | Gluconeogenesis                        | 0.0114 | <i>DDB1, GOT1</i>          |
| GO:0003018 | Group-11, 13, 14 | Vascular process in circulatory system | 0.0002 | <i>AGTR2, SLC2A3</i>       |

<sup>a</sup>Adjusted group  $p$  value corrected with Bonferroni step down procedure. Abbreviations: Associated DEGs, differentially expressed genes associated with the regulation of diabetes; GO, Gene Ontology.

**Table S10.** The top 20 core nodes and their corresponding degree.

| <b>Node</b> | <b>Degree</b> | <b>Domain summary</b>                                                       |
|-------------|---------------|-----------------------------------------------------------------------------|
| GNAQ        | 14            | Guanine nucleotide-binding protein G(q) subunit alpha                       |
| AGT         | 11            | Angiotensinogen; Essential component of the renin-angiotensin system        |
| CCR5        | 11            | C-C chemokine receptor type 5                                               |
| CXCR4       | 11            | C-X-C chemokine receptor type 4                                             |
| ADRBK1      | 9             | Beta-adrenergic receptor kinase 1                                           |
| AGTR2       | 9             | Type-2 angiotensin II receptor                                              |
| CD4         | 9             | T-cell surface glycoprotein CD4                                             |
| PLCB1       | 8             | 1-phosphatidylinositol 4,5-bisphosphate phosphodiesterase beta-1            |
| AGTR1       | 7             | Type-1 angiotensin II receptor                                              |
| GRM5        | 6             | Metabotropic glutamate receptor 5; G-protein coupled receptor for glutamate |
| ITIH4       | 6             | Inter-alpha-trypsin inhibitor heavy chain family member 4                   |
| REN         | 6             | Renin                                                                       |
| ACE         | 5             | Angiotensin-converting enzyme                                               |
| CD28        | 5             | T-cell-specific surface glycoprotein CD28                                   |
| GLUD1       | 5             | Glutamate dehydrogenase 1, mitochondrial                                    |
| GPT2        | 5             | Alanine aminotransferase 2                                                  |
| LCK         | 5             | Tyrosine-protein kinase Lck                                                 |
| LIPE        | 5             | Hormone-sensitive lipase                                                    |
| MGLL        | 5             | Monoglyceride lipase                                                        |
| RGS4        | 5             | Regulator of G-protein signaling 4                                          |

**Table S11.** CeRNA connectivity (top 20).

| <b>ID</b>       | <b>Type</b> | <b>Degree</b> | <b>up_down</b> |
|-----------------|-------------|---------------|----------------|
| MiR-214-3p      | miRNA       | 14            | down           |
| MiR-484         | miRNA       | 13            | up             |
| MiR-1255b-5p    | miRNA       | 11            | down           |
| MiR-548o-3p     | miRNA       | 10            | up             |
| MiR-199b-5p     | miRNA       | 9             | up             |
| MiR-8           | miRNA       | 8             | up             |
| MiR-371a-5p     | miRNA       | 6             | down           |
| MiR-4433b-5p    | miRNA       | 6             | down           |
| MiR-372-3p      | miRNA       | 5             | down           |
| MiR-25-5p       | miRNA       | 5             | down           |
| ADAMTS15        | mRNA        | 4             | up             |
| MiR-351-3p      | miRNA       | 4             | down           |
| MiR-3944-5p     | miRNA       | 4             | up             |
| ENST00000664283 | lncRNA      | 4             | down           |
| PRKN            | mRNA        | 3             | down           |
| CAMK4           | mRNA        | 3             | up             |
| ENST00000379053 | lncRNA      | 3             | up             |
| CYP19A1         | mRNA        | 3             | up             |
| ENST00000659693 | lncRNA      | 3             | up             |
| MiR-202-5p      | miRNA       | 3             | down           |

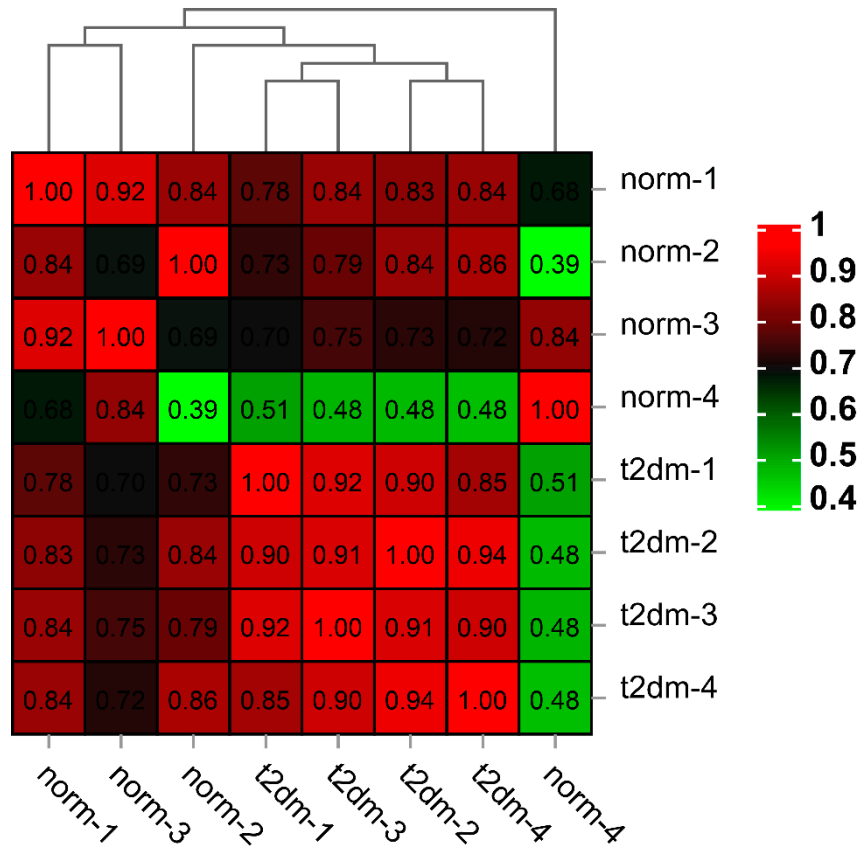

**Figure S1.** Samples correlation analysis

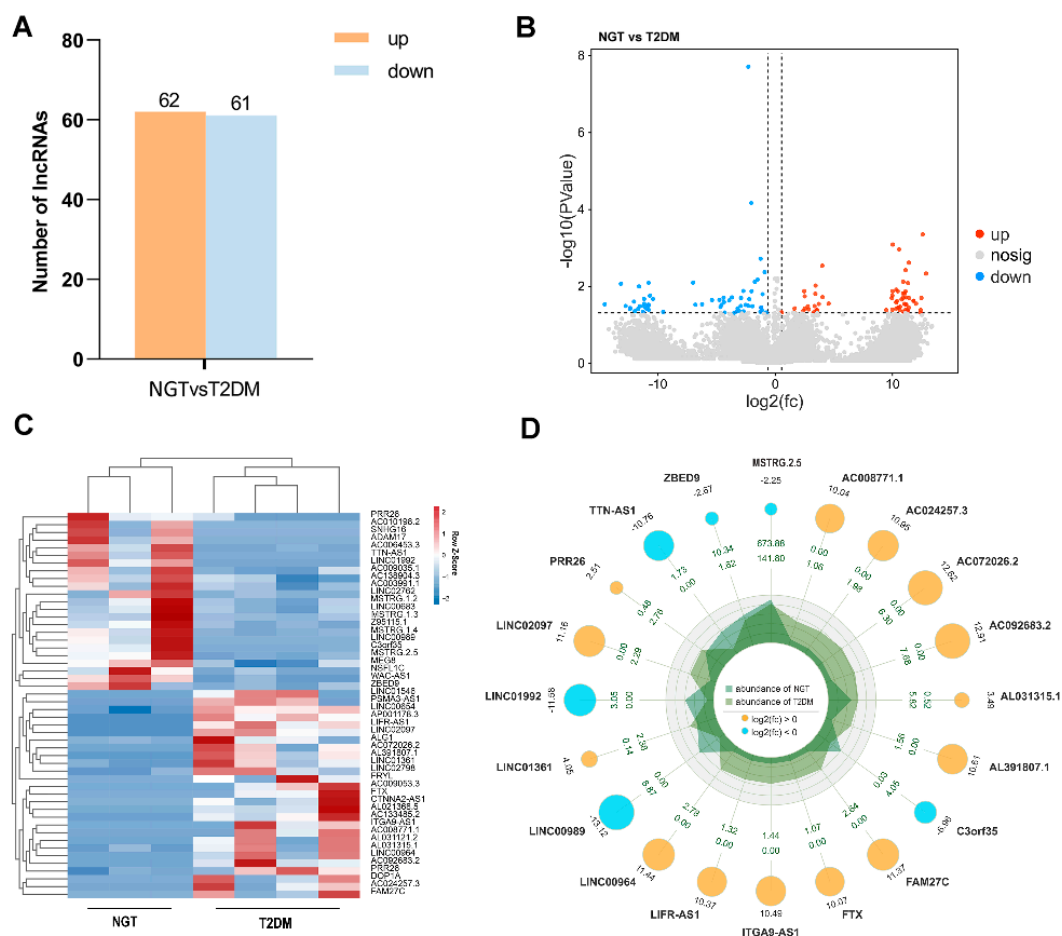

**Figure S2.** The expression profiles of lncRNA. (A) The column chart of the number of statistical DElncRNA. (B) The volcano plot displays the distribution of DElncRNA. (C) Hierarchical clustering analysis of differentially expressed lncRNAs between T2DM group and NGT group were showed by the heat map. Red colour represents up-regulated lncRNAs, and the blue colour represents down-regulated lncRNAs. (D) The radar plots display the distribution of DElncRNA and the size of the circle indicates the  $\log_2(\text{FC})$ . lncRNA, long noncoding RNA; NGT, normal glucose tolerance; T2DM, type 2 diabetes mellitus; Log2 (FC),  $\log_2(\text{fold change})$ .



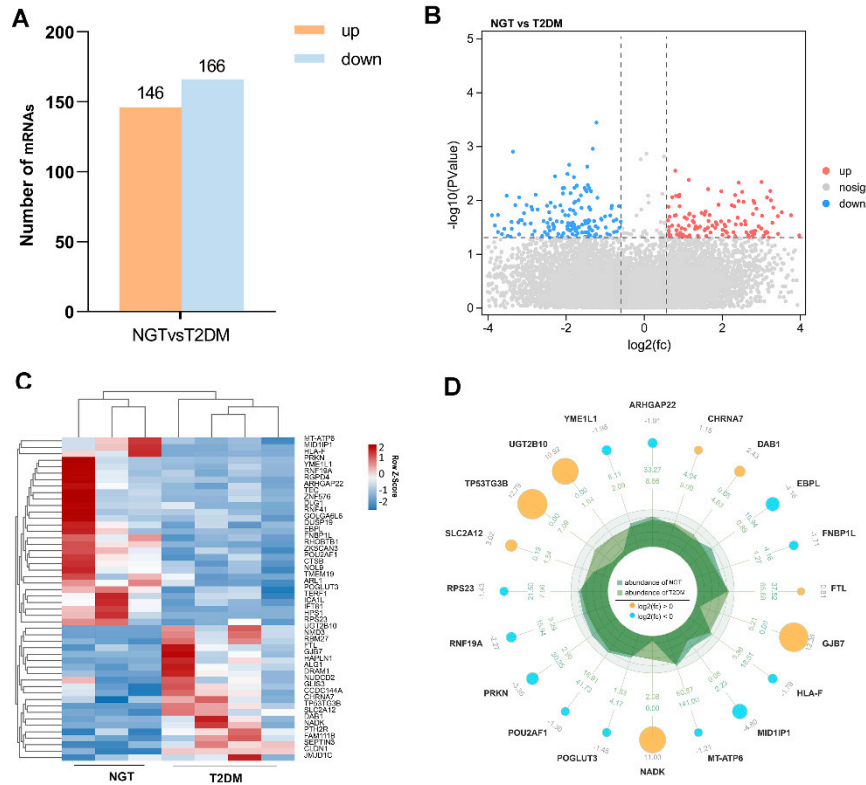

**Figure S3.** The expression profiles of Genes. (A) The column chart of the number of statistical DEGs. (B) The volcano plot displays the distribution of DEGs. (C) Hierarchical clustering analysis of differentially expressed mRNAs between T2DM group and NGT group were showed by the heat map. Red colour represents up-regulated mRNAs, and the blue colour represents down-regulated mRNAs. (D) The radar plots display the distribution of DEGs and the size of the circle indicates the log2(FC). DEGs, differentially expressed genes; NGT, normal glucose tolerance; T2DM, type 2 diabetes mellitus; Log2(FC), log2(fold change).

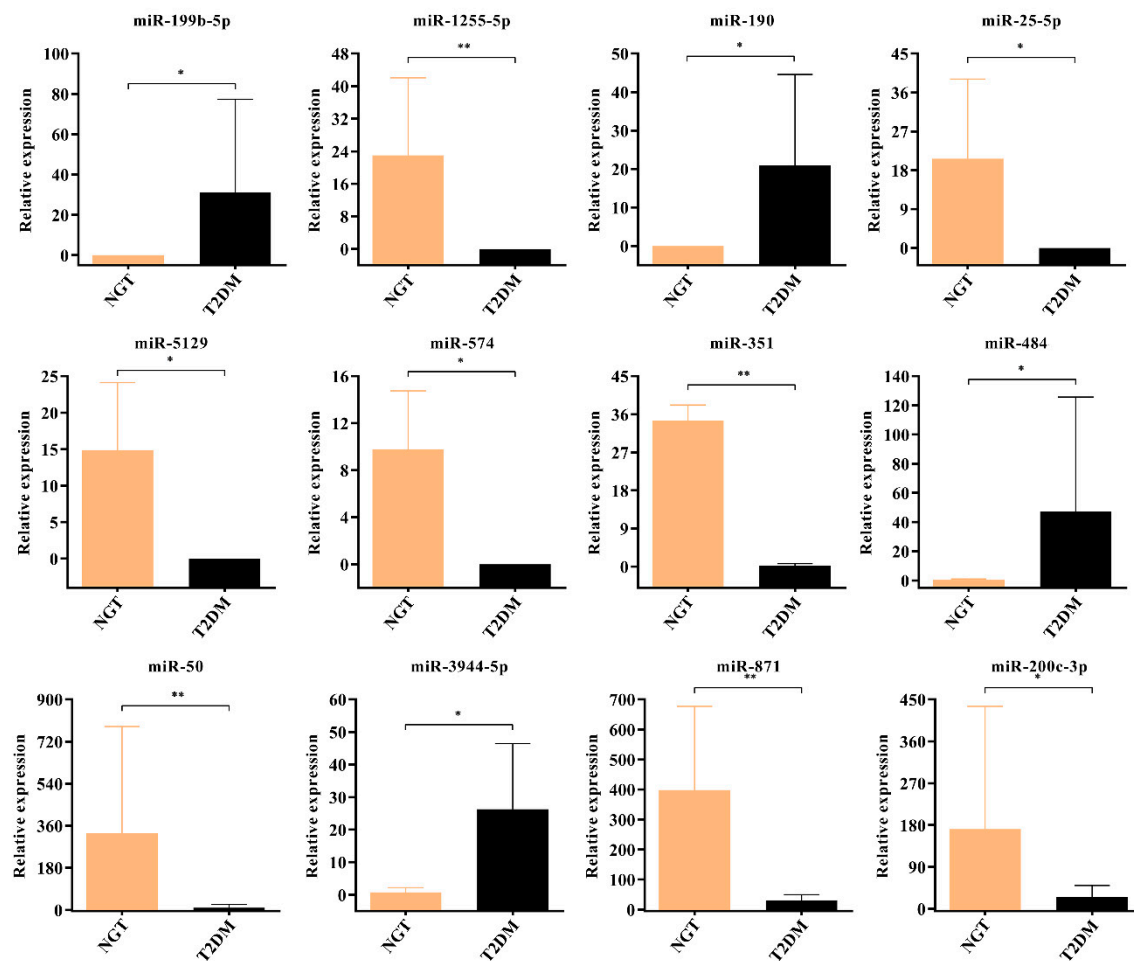

**Figure S4.** Comparison of the expression of 12 miRNAs in control and T2DM subjects. Column and error bar indicated means and standard deviations. MiRNAs, microRNA; NGT, normal glucose tolerance; T2DM, type 2 diabetes mellitus. \*  $p < 0.05$ , \*\*  $p < 0.01$ . The  $p$ -values were obtained using edgeR method.

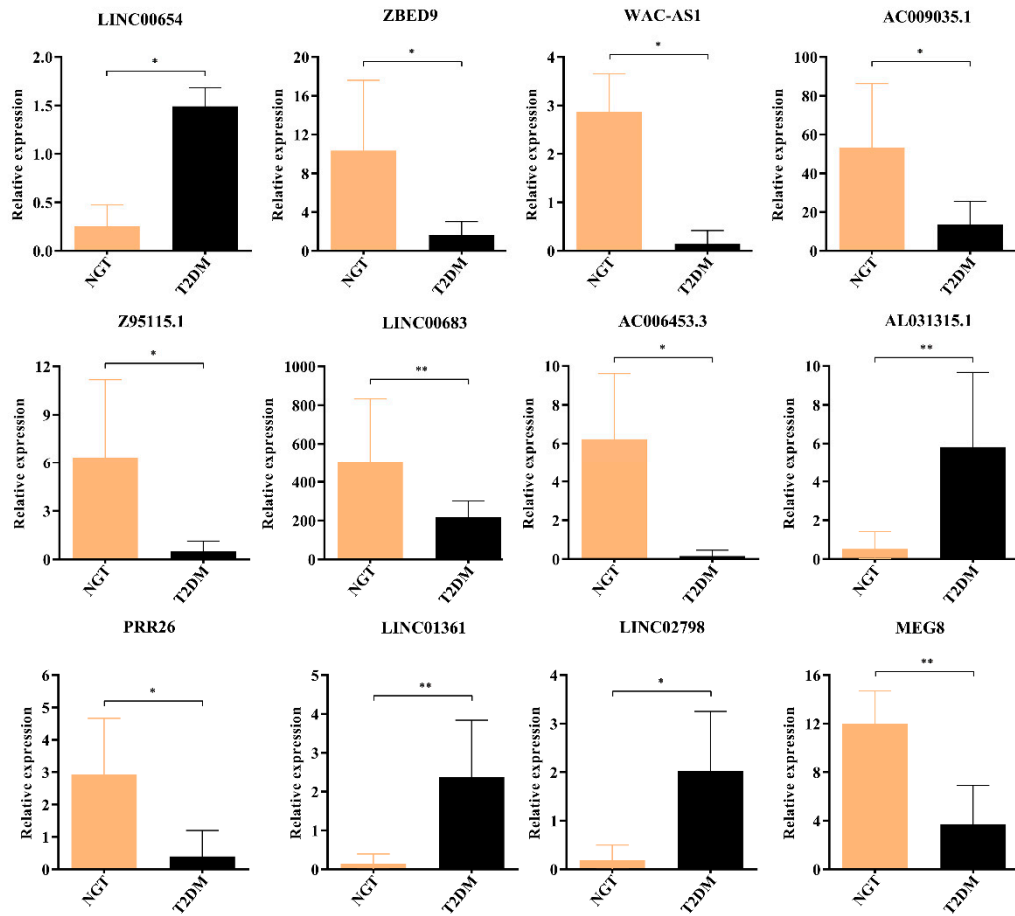

**Figure S5.** Comparison of the expression of 12 lncRNAs in control and T2DM subjects. Column and error bar indicated means and standard deviations. LncRNAs, long non-coding RNAs; NGT, normal glucose tolerance; T2DM, type 2 diabetes mellitus. \*  $p < 0.05$ ; \*\*  $p < 0.01$ . The  $p$ -values were obtained using edgeR method.

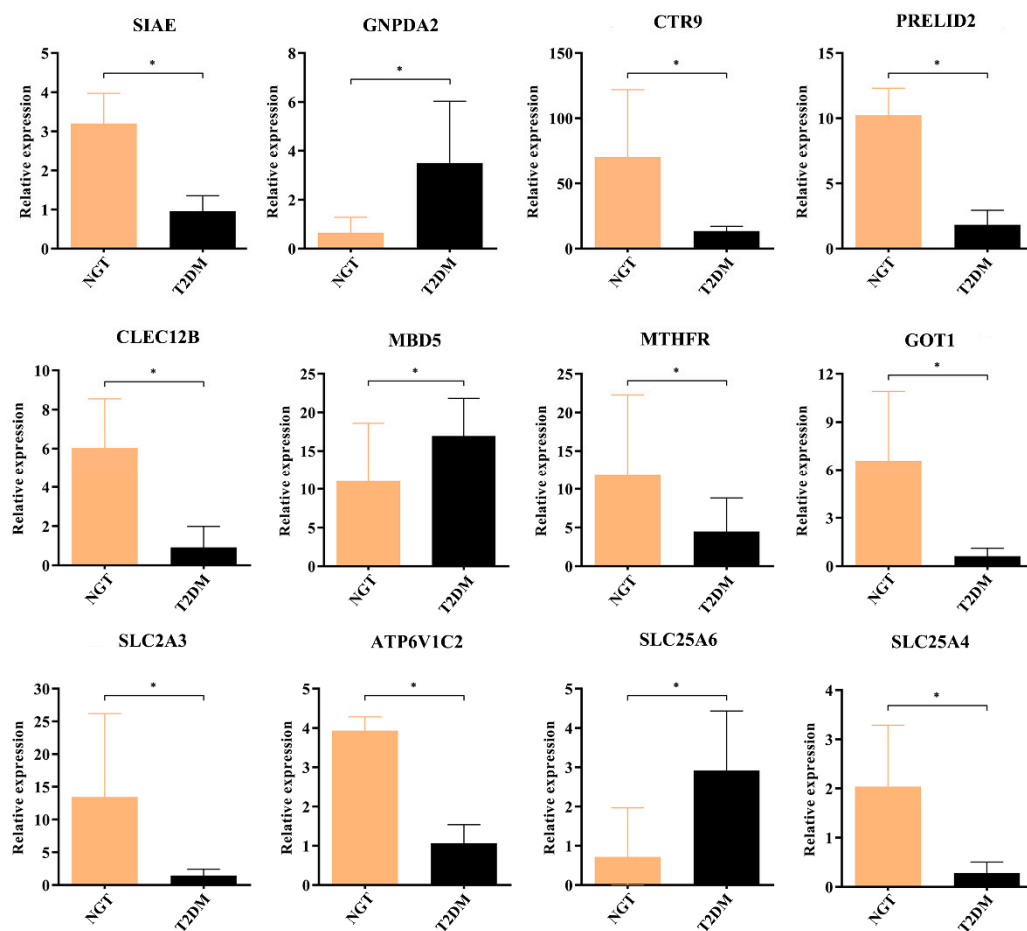

**Figure S6.** Comparison of the expression of 12 mRNAs in control and T2DM subjects. Column and error bar indicated means and standard deviations. mRNA, messenger RNA; NGT, normal glucose tolerance; T2DM, type 2 diabetes mellitus. \*  $p < 0.05$ ; The  $p$ -values were obtained using edgeR method.
